# Supplementary material for: Super-enhancer mediated regulation of adult β-globin gene expression: the role of eRNA and Integrator
Source: PubMed Central journal article supplement — Nucleic Acids Res. 2021 Jan 21;49(3):1383–96. doi: 10.1093/nar/gkab002 (PMC7897481; doi:10.1093/nar/gkab002), 2021-01-21
Supplement: gkab002_supplemental_file.pdf [file gkab002_supplemental_file.pdf]

Supplementary Table

shRNA sequences:

| shRNA             | Sequence (TARGET SEQUENCES IN RED)                                                                                                                                                                                                                                                                                                                          |
|-------------------|-------------------------------------------------------------------------------------------------------------------------------------------------------------------------------------------------------------------------------------------------------------------------------------------------------------------------------------------------------------|
| scrambled_control | <p>Top:5'TCGAGAAGGTATATTGCTGTTGACAGTGAGCG<b>CCTCGC</b><br/> <b>TTGGGCGAGAGTAAG</b>ATAGTGAAGCCACAGATGTAT<b>CCTTAC</b><br/> <b>TCTCGCCCAAGCGAGA</b>TGCCTACTGCCTCGG 3'</p> <p>Bottom:5'AATTCCGAGGCAGTAGGCCA<b>CCTCGCTTGGGCGAGA</b><br/> <b>GTAAG</b>TACATCTGTGGCTTCACTA<b>TCTTACTCTCGCCCAAG</b><br/> <b>CGAG</b>ACGCTCACTGTCAACAGCAATATA<b>CCTTC</b> 3'</p>    |
| INTs11kd(1)       | <p>Top:5'TCGAGAAGGTATATTGCTGTTGACAGTGAGCG<b>AAGGA</b><br/> <b>ACATGTTTGAGTTTAAA</b>ATAGTGAAGCCACAGATGTAT<b>TTTAAA</b><br/> <b>CTCAAACATGTTCTCTG</b>TGCCTACTGCCTCGG 3'</p> <p>Bottom:5'AATTCCGAGGCAGTAGGCCA<b>AAGGAACATGTTTGAG</b><br/> <b>TTTAAA</b>TACATCTGTGGCTTCACTA<b>TTTAAACTCAAACATGT</b><br/> <b>TCCTG</b>CGCTCACTGTCAACAGCAATATA<b>CCTTC</b> 3'</p> |
| INTs11kd(2)       | <p>Top:5'TCGAGAAGGTATATTGCTGTTGACAGTGAGCG<b>AAGGG</b><br/> <b>CAGGAAATGAGAAGAAA</b>ATAGTGAAGCCACAGATGTAT<b>TTTCT</b><br/> <b>TCTCATTTCCTGCCCTG</b>TGCCTACTGCCTCGG 3'</p> <p>Bottom:5'AATTCCGAGGCAGTAGGCCA<b>AAGGGCAGGAAATGAG</b><br/> <b>AAGAAA</b>TACATCTGTGGCTTCACTA<b>TTTCTTCTCATTTCCTGC</b><br/> <b>CCTG</b>CGCTCACTGTCAACAGCAATATA<b>CCTTC</b> 3'</p>  |
| HS2 3'eRNA(A)     | <p>Top:5'TCGAGAAGGTATATTGCTGTTGACAGTGAGCG<b>AACCT</b><br/> <b>AGAAGCAACAGAATCAA</b>ATAGTGAAGCCACAGATGTAT<b>TGAT</b><br/> <b>TCTGTTGCTTCTAGGTG</b> TGCCTACTGCCTCGG 3'</p> <p>Bottom:5'AATTCCGAGGCAGTAGGCCA<b>AACCTAGAAGCAACAG</b><br/> <b>AATCAA</b>TACATCTGTGGCTTCACTA<b>TTGATTCTGTTGCTTCTA</b><br/> <b>GGTG</b>CGCTCACTGTCAACAGCAATATA<b>CCTTC</b> 3'</p>  |
| HS2 3'eRNA (B)    | <p>Top:5' TCGAGAAGGTATATTGCTGTTGACAGTGAGCG<br/> <b>AAGTGACATAACCTAGAATATA</b>ATAGTGAAGCCACAGATGTA<br/> <b>TATATTCTAGGTTATGTC</b>ACTGTGCCTACTGCCTCGG 3'</p>                                                                                                                                                                                                  |

|  |                                                                                                                                                                     |
|--|---------------------------------------------------------------------------------------------------------------------------------------------------------------------|
|  | Bottom:5' AATTCCGAGGCAGTAGGCA <b>AAGTGACATAACCTAG</b><br><b>AATATA</b> TACATCTGTGGCTTCACTA <b>TATATTCTAGGTTATGTC</b><br><b>ACTG</b> CGCTCACTGTCAACAGCAATATACCTTC 3' |
|--|---------------------------------------------------------------------------------------------------------------------------------------------------------------------|

Primers for confirming transgenic line

|                    |                      |
|--------------------|----------------------|
| pLCR 622           | AACTCGGTGATGATGGAAGC |
| pLCR 629           | GCGTCAGAACTGTGTGTGG  |
| inversePCR 5' pLCR | GAAAACAGGAGTGCAGAGGC |
| inversePCR 3' pLCR | AATGGTCCAAGATGGTGGAG |

qRT PCR primers

|                   |                                 |
|-------------------|---------------------------------|
| GAPDF             | TGGTGAAGGTCGGTGTGAAC            |
| GAPDH R           | CCATGTAGTTGAGGTCAATGAAGG        |
| $\beta$ major F   | CACATTTGCTTCTGACATA             |
| $\beta$ major R   | GCAGAGGCAGAGGATAGGTC            |
| $\alpha$ globin F | CCTGGGGGAAGATTGGTG              |
| $\alpha$ globin R | GCCGTGGCTTACATCAAAGT            |
| GATA1 F           | ACTCCCCAGTCTTTCAGGTGTA          |
| GATA1 R           | GGTGAGCCCCCAGGAATT              |
| 3'HS2 F           | CCTTGCTGTGTGACATAACCT           |
| 3'HS2 R           | TCTGTTGCTTCTAGGTATGAGTCT        |
| 5'HS2 F           | CCCTGTTTCCTTATCTGACCTG          |
| 5'HS2 R           | AGGCAGCTTCCTCATTTAGC            |
| 5mHS2 F           | GGTCTTCTGGCAGACAGGTCA           |
| 5'mHS2 R          | TGGACAGTGGTACTGCAATAATTG        |
| 3'mHS2 F          | GGACCCTGCCTTGCTGTG              |
| 3'mHS2 R          | TCAAGCCCATTCCAAATAGCA           |
| 5'mHS3 F2         | CTGCTCTACGCTACATTATGCTACACTACTC |
| 5'mHS3 F1         | TCCTCGGTGACTGAGATTTTGGGAATGC    |

|                   |                                |
|-------------------|--------------------------------|
| 5'mHS3 R1         | ACCCATTGAATCCTCATCAGGGAAACA    |
| 5'mHS3 R2         | GCTGAGTCAAAGTTCTCTGTAGTAAGGGTC |
| 3'mHS3 F2         | CAAACATGAGAGCAGTAGGACAAAGGGT   |
| 3'mHS3 F1         | AACCCCATGCCTCCTGATTTTAGGT      |
| 3'mHS3 R1         | GACAGGGTATAGGTTTGTTGCTGTTGTTG  |
| 3'mHS3 R2         | GTTTCTACACCAATCTTCTCAGCTCCTGC  |
| 5'mHS2 F2         | GGAGAGACATCCAGCATTCAAACCCT     |
| 5'mHS2 F1         | ACCCTGTTTCCTTATCTGACCTGC       |
| 5'mHS2 R1         | AGTTGGATATAGAGTGAAGGAGGTCACAAC |
| 3'mHS2 R1         | ACATCCCTGATGAGTACCTCTCATGTTC   |
| 3'mHS2 R2         | GCTAGGTGCTTCCTTTTCTTCCTCCA     |
| INTs11 F          | GAAGCTGCATCTTGGTCTCC           |
| INTs11 R          | TAGATGGGTCCATCGTAGCC           |
| INTs1 F           | CCCTGAGGACGACTTAGCTG           |
| INTs1 R           | GTGATGCATAGCCAGAGCAA           |
| GAPDH_exon_exon F | CGTCCCGTAGACAAAATGGT           |
| GAPDH_exon_exon R | TCAATGAAGGGGTCGTTGAT           |
| GAPDH_intron F    | CGTTGTGAGGTGCATACCTTT          |
| GAPDH_intron R    | GCCGAGAGGAATGAGGTTAG           |
| M_45s_pre_F       | CGTGTAAGACATTCCTATCTCG         |
| M_45s_pre_R       | GCCCGCTGGCAGAACCAGAAG          |
| hs2_5core_F       | TCCCTTCCAGCATCCTCATC           |
| hs2_5core_R       | TGCTTGGACTATGGGAGGTC           |
| hs2_3core_F       | GTGTGTGCCAGATGTTCTC            |
| hs2_3core_R1      | GCCGTTTGAGGTGGAGTTTT           |
| hs2_3core_R2      | CTGTCTCAGGCATCCATTTTCT         |
| hs2_5flank_F      | CTTGGACTCTTGTGGGGAATAAGA       |
| hs2_5flank_R      | ACCTGCTGGATGCTAAACACT          |

|                 |                          |
|-----------------|--------------------------|
| hs2_3flank_F    | AGAAAATGGATGCCTGAGACAG   |
| hs2_3flank_R    | ACCTAGAAGCGGCAGAATCA     |
| hs3_5core_F     | TGAAAACATAGGAGTCAAGGCAC  |
| hs3_5core_R     | GTAGAGGGCAGACATGGGAA     |
| hs3_3core_F     | CCTGGAACCTCTGATAGACACAT  |
| hs3_3core_R     | ATTTGGGAGCAGGAGTCTCT     |
| hs2_3flank_F    | ACTTCTTCATGGCTGTCTCCT    |
| hs2_3flank_F    | TTGCCTAAGGTCGGACATGT     |
| h_gata1_f       | CCACTACCTATGCAACGCCT     |
| h_gata1_r       | ACCTGCCCCGTTTACTGACAA    |
| h_usf1_f        | CAAGAAGTACTGCAGGGAGGA    |
| h_usf1_r        | TATGCTGAGCCCTGCGTTT      |
| h_bactin_f      | CCAACCGCGAGAAGATGAC      |
| h_bactin_r      | ACGATGCCAGTGGTACGG       |
| h_bglobin_f     | GCACGTGGATCCTGAGAACT     |
| h_bglobin_r     | GCCACCACTTTCTGATAGGC     |
| h_gamma_f       | GATGCCATAAAGCACCTGGATG   |
| h_gamma_r       | TTGCAGAATAAAGCCTATCCTTGA |
| h_alphaglogin_f | GCCCTGAGCGACCTGCAC       |
| h_alphaglobin_r | CACCGCAGGGGTGAACTC       |

#### ChIP Primers

|                          |                          |
|--------------------------|--------------------------|
| LCR HS2 F                | TGCAGTACCACTGTCCAAGG     |
| LCR HS2 R                | ATCTGGCCACACACCCTAAG     |
| $\beta$ major promoter F | AAGCCTGATTCCGTAGAGCCACAC |
| $\beta$ major promoter R | CCCACAGGCCAGAGACAGCAGC   |
| GAPDH promoter F         | GATGATGGAGGACGTGATGG     |
| GAPDH promoter R         | GGCTGCAGGAGAAGAAAATG     |

|                      |                            |
|----------------------|----------------------------|
| HS2 core + 50bp F    | CACACCCTAAGCCTCAGCAT       |
| HS2 core +50bp R     | TGCAGTACCACTGTCCAAGG       |
| HS2 core + 150bp F   | GCCAGAAGACCTGGTCAAAA       |
| HS2 core +150bp R    | CCCACACCTTTCTCTGAACA       |
| Mouse LCR CND F      | ACATGGTGCTTTTGGGATATAG     |
| Mouse LCR CND R      | CATGTGTGGGATGCCTTACTA      |
| Human LCR HS2 F      | CGCCTTCTGGTTCTGTGAA        |
| Human LCR HS2 R      | GAGAACATCTGGGCACACAC       |
| Human HS2-3 linker F | CTATTTGCTAACAGACAATAGAGTAG |
| Human HS2-3 linker R | GTTACATATGCAGAAAGCCACAAATC |
| Human LCR CND F      | CCTTGGTCAAGCTGCAACTT       |
| Human LCR CND F      | AAGACGGAGCCAATGGGTTA       |

#### DNA/RNA FISH Probes

|                                  |                                 |
|----------------------------------|---------------------------------|
| 3'HS2 RNA F                      | GGACCCTGCCTTGCTGTG              |
| 3'HS2 RNA R                      | TCTGTTGCTTCTAGGTATGAGTCT        |
| $\beta$ globin Probe +ve strand  | GACGCGGCCGCCAGCGTATGCAATCGTCACT |
| $\beta$ globin Probe - ve strand | CGACCGCGGGTTAGTGCCTGCTGGAAAGC   |
